# Supplementary material for: Porous intermetallic Ni2XAl (X = Ti or Zr) nanoparticles prepared from oxide precursors
Source: Nanoscale Adv. 2021 Feb 22;3(7):1901–5. doi: 10.1039/d1na00047k (PMC9417867; doi:10.1039/d1na00047k)
Supplement: NA-003-D1NA00047K-s001 [file NA-003-D1NA00047K-s001.pdf]

## Electronic Supplementary Information

### **Porous intermetallic Ni<sub>2</sub>XAl (X = Ti or Zr) nanoparticles prepared from oxide precursors**

Yasukazu Kobayashi <sup>\*a</sup>, Shohei Tada <sup>b</sup>, and Ryuji Kikuchi <sup>c</sup>

*a Interdisciplinary Research Center for Catalytic Chemistry, National Institute of Advanced Industrial Science and Technology (AIST), 1-1-1 Higashi, Tsukuba, Ibaraki 305-8565, Japan.*

*b Department of Materials Science and Engineering, Ibaraki University, 4-12-1 Nakanarusawacho, Hitachi, Ibaraki 316-8511, Japan.*

*c Department of Chemical System Engineering, The University of Tokyo, 7-3-1 Hongo, Bunkyo-ku, Tokyo 113-8656, Japan.*

*\*E-mail: [yasu-kobayashi@aist.go.jp](mailto:yasu-kobayashi@aist.go.jp)*

## 1. Experimental

### 1.1. Sample Characterization

The crystal structure was investigated by X-ray diffraction (XRD, SmartLab (3kW), Rigaku) with CuK $\alpha$  radiation at 40 kV and 45 mA. The porosity was examined by nitrogen adsorption/desorption at -196 °C (BELSORP mini-II, Microtrac-BEL). The sample was pre-treated at 200 °C for 30 min under vacuum before the measurement. The pore size distribution was analyzed from the measured isotherms using the Barrett, Joyner, and Halenda (BJH) method. The morphology was observed by Scanning Electron Microscope (SEM, JSM-7800F, JEOL Ltd.) and (Scanning) Transmission Electron Microscope ((S)TEM, Tecnai Osiris, FEI) with energy-dispersive X-ray spectroscopy (EDS) for elemental analysis. Metallic/oxidation states of constituent elements in the final samples were confirmed by X-ray Photoelectron Spectroscopy (XPS, JPS-9010TR, JEOL Ltd.). The spectra were corrected by referencing the binding energy to carbon (C1s 284.6 eV). Commercial Nickel powder (Wako Pure Chem. Corp.), TiO<sub>2</sub> (JRC-TIO-15, Supplied by Catalysis Society of Japan) and Al<sub>2</sub>O<sub>3</sub> (JRC-ALO-9, Supplied by Catalysis Society of Japan) were used for references. To remove the surface oxide layer of the sample, we used an Ar<sup>+</sup> etching ion gun (JEOL XP-HSIG, 600 V, 12 mA, 60 s).

### 1.2. Catalytic performance test

The catalytic performance for CO<sub>2</sub> activation was evaluated in a 6 mm (i.d.) fixed-bed tubular reactor at atmospheric pressure. The catalyst of 30 mg and quartz sand (Wako Chemicals Corp.) of 1 g was placed in the reactor and then pretreated at 500 °C for 1 h under a flow of 10%H<sub>2</sub>/N<sub>2</sub> gas prior to each run. The feed gas consists of 10% CO<sub>2</sub>, 40% H<sub>2</sub> and 50% He in a total flow rate of 50 mL/min. The gas composition at the reactor outlet was analyzed using non-dispersive infrared spectroscopy (NDIR) (VA-3111, HORIBA, Ltd.).

A porous intermetallic NiAl powder was also tested for comparison. It was prepared through the same preparation method as that of Ni<sub>2</sub>TiAl(RDT) and Ni<sub>2</sub>ZrAl(RDT). The crystal structure of these intermetallic compounds is all the same, which means that Ni<sub>2</sub>TiAl and Ni<sub>2</sub>ZrAl are obtainable by substituting a half of Al in a NiAl crystal structure with Ti or Zr. For all catalysts, the only products observed were CO, CH<sub>4</sub>, and H<sub>2</sub>O. Turnover frequencies (TOF) for CO<sub>2</sub> activation and CH<sub>4</sub> production were calculated to compare the intrinsic catalytic performances based on surface nickel site. The number of surface nickel sites was estimated from the BET surface area and atomic radii of the constituent elements in each catalyst (**Table S3**). With the

number of active sites, the TOF values for CO<sub>2</sub> activation (TOF(CO<sub>2</sub>)) and CH<sub>4</sub> production (TOF(CH<sub>4</sub>)) were then calculated from CO<sub>2</sub> reaction rate and CH<sub>4</sub> production rates, respectively. For the Arrhenius plots over NiAl, Ni<sub>2</sub>TiAl(RDT) and Ni<sub>2</sub>ZrAl(RDT), over the range of changed reaction temperature, good linearities were observed for all catalysts and the apparent activation energies (E<sub>a</sub>) were obtained as listed in **Table S4**.

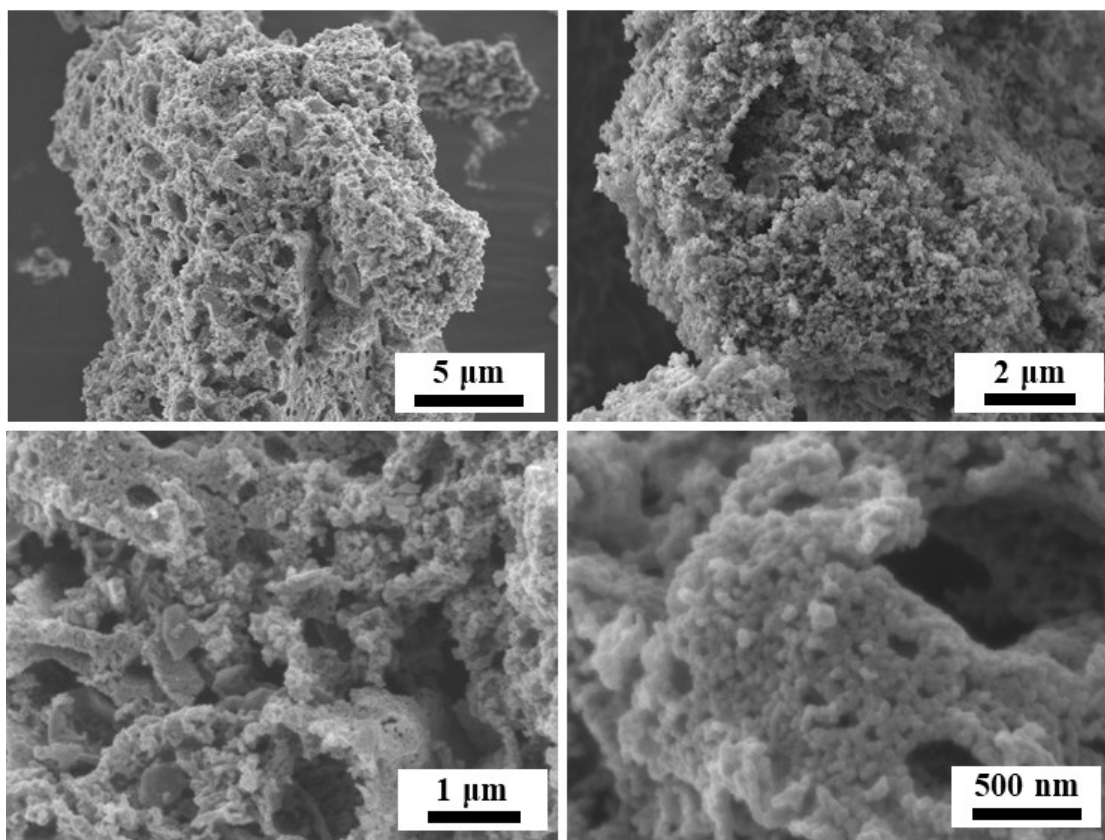

**Fig. S1** SEM images of  $\text{Ni}_2\text{TiAl(RDT)}$ .

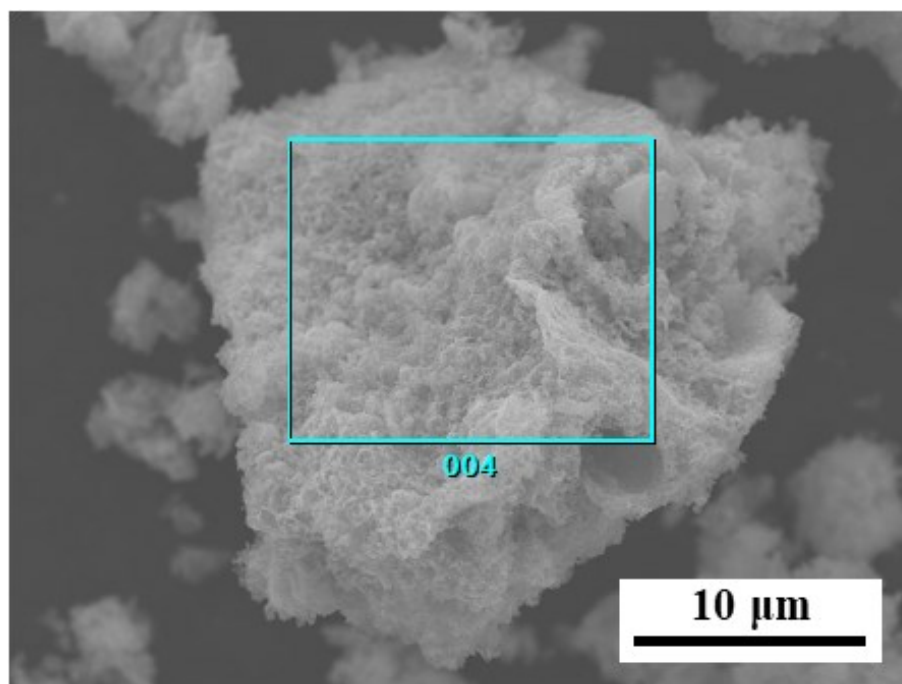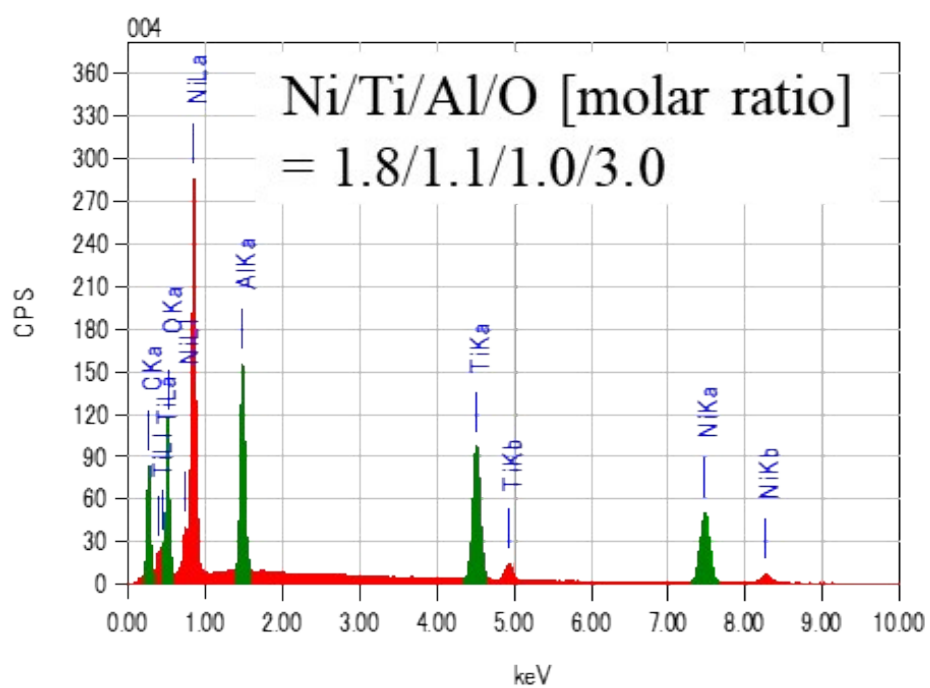

**Fig. S2** A SEM image and the elemental analysis on Ni<sub>2</sub>TiAl(RDT).

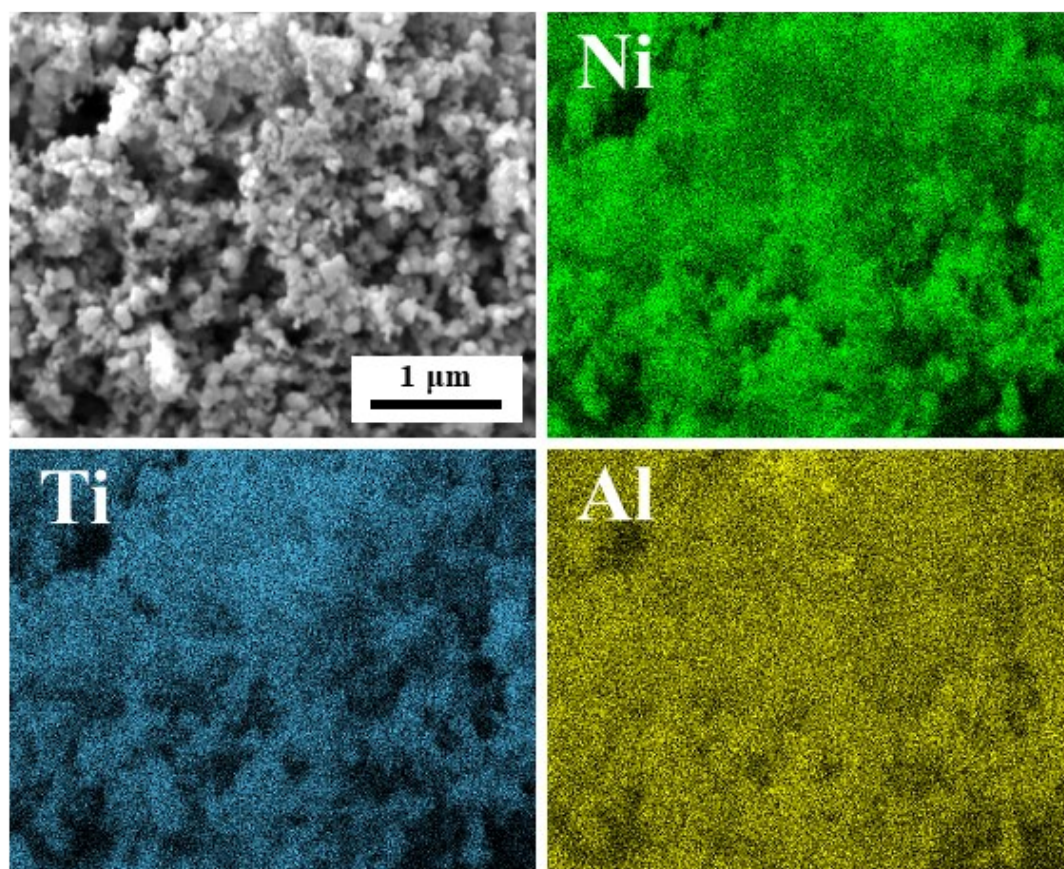

**Fig. S3** A SEM image and the elemental mapping of Ni, Ti and Al on  $\text{Ni}_2\text{TiAl(RDT)}$ .

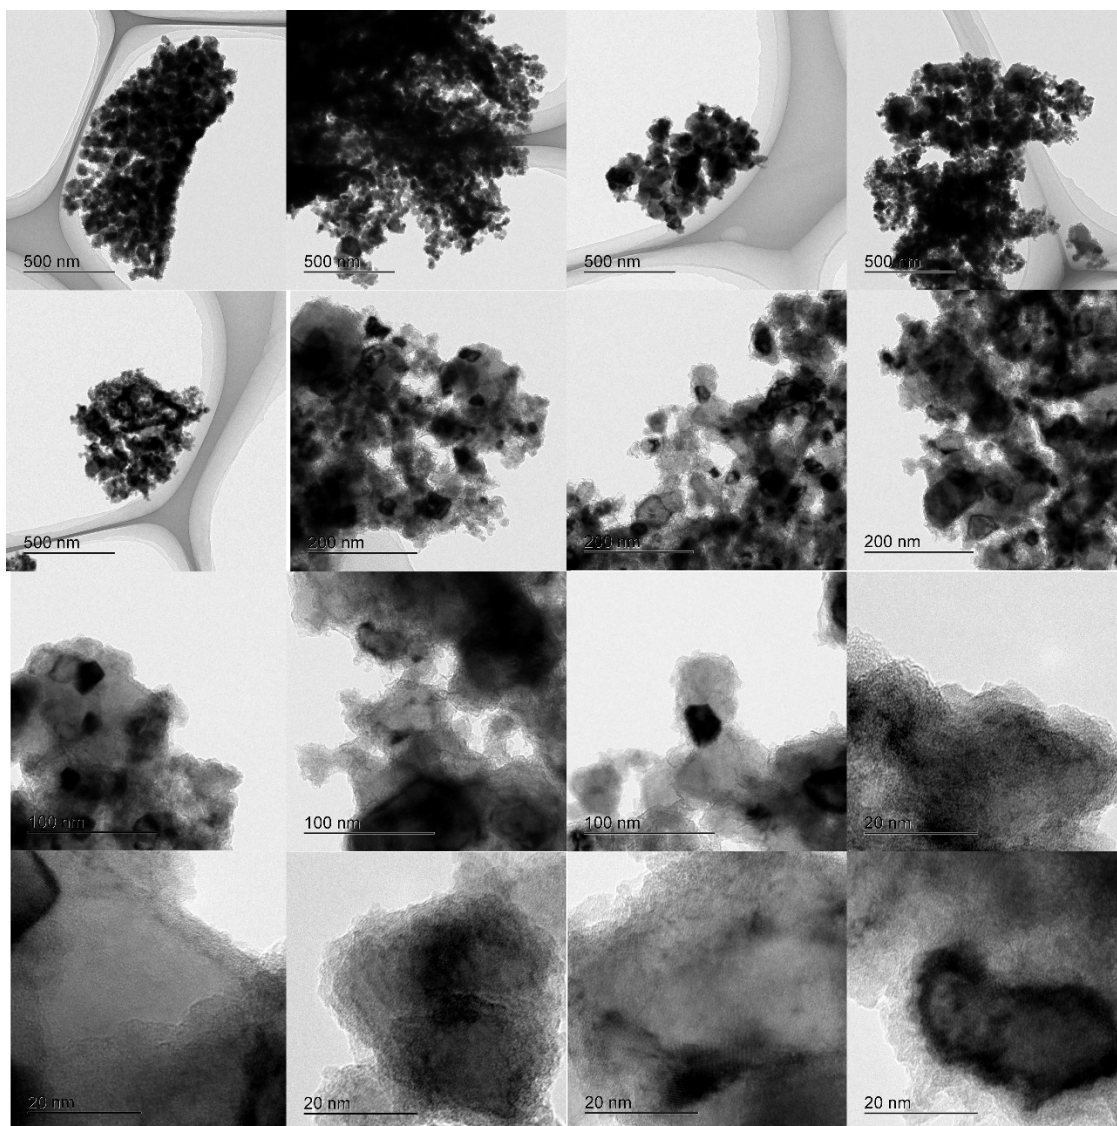

**Fig. S4** TEM images of  $\text{Ni}_2\text{TiAl(RDT)}$ .

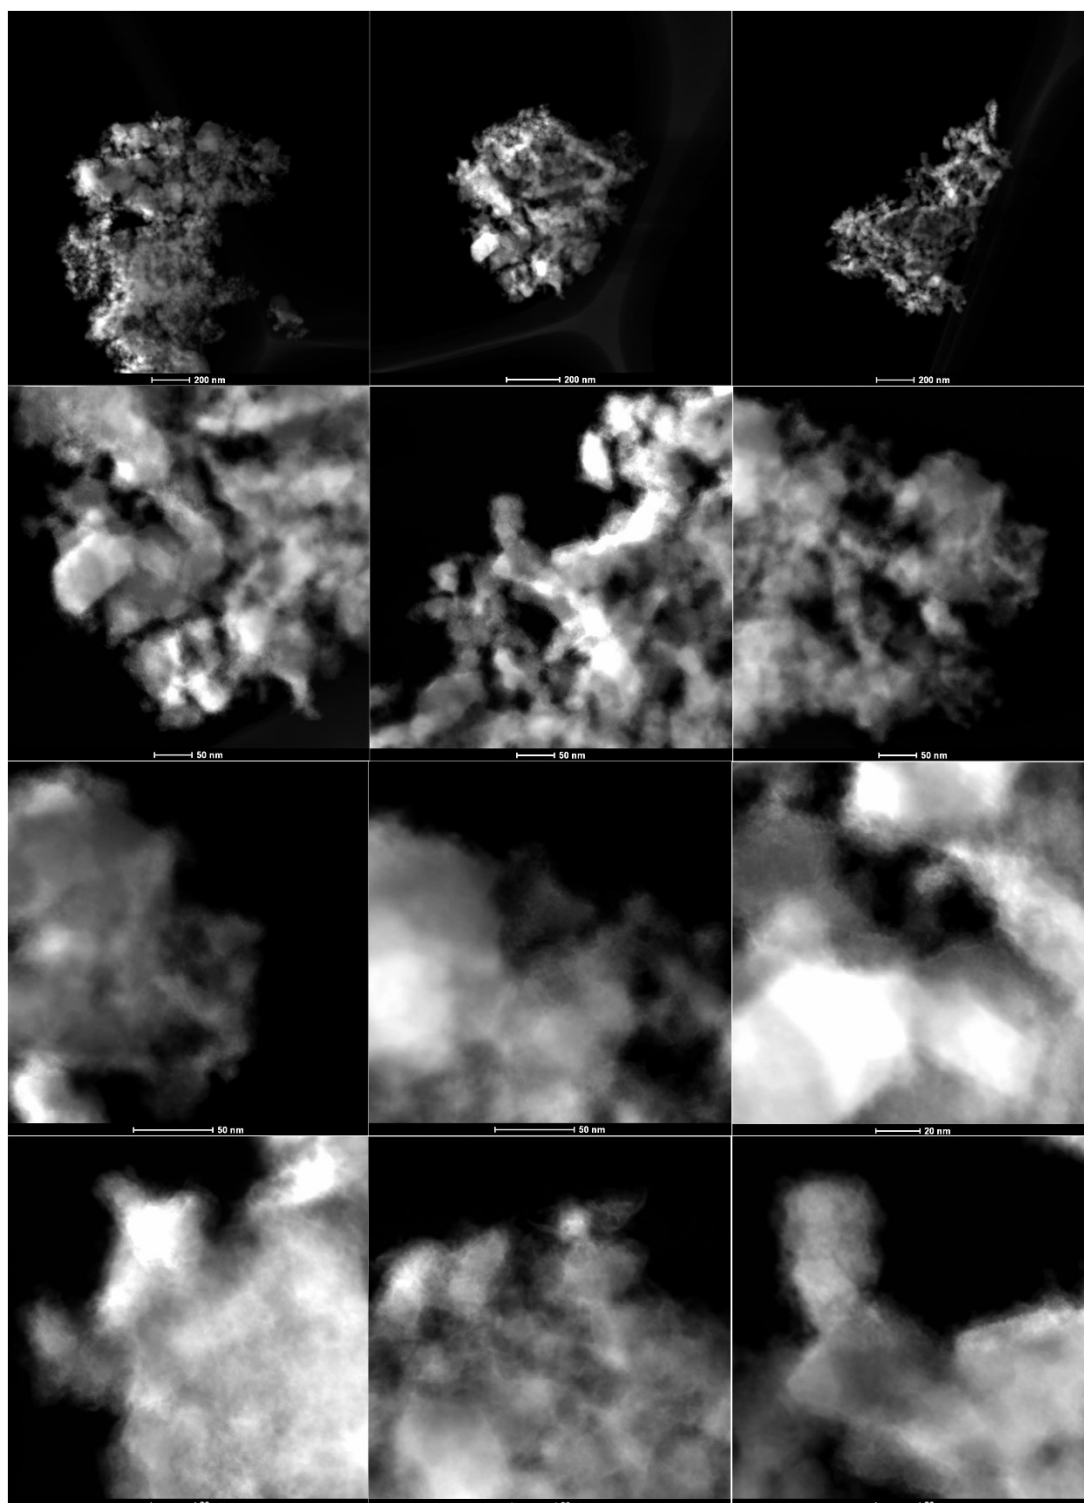

**Fig. S5** HAADF-STEM images of  $\text{Ni}_2\text{TiAl(RDT)}$ .

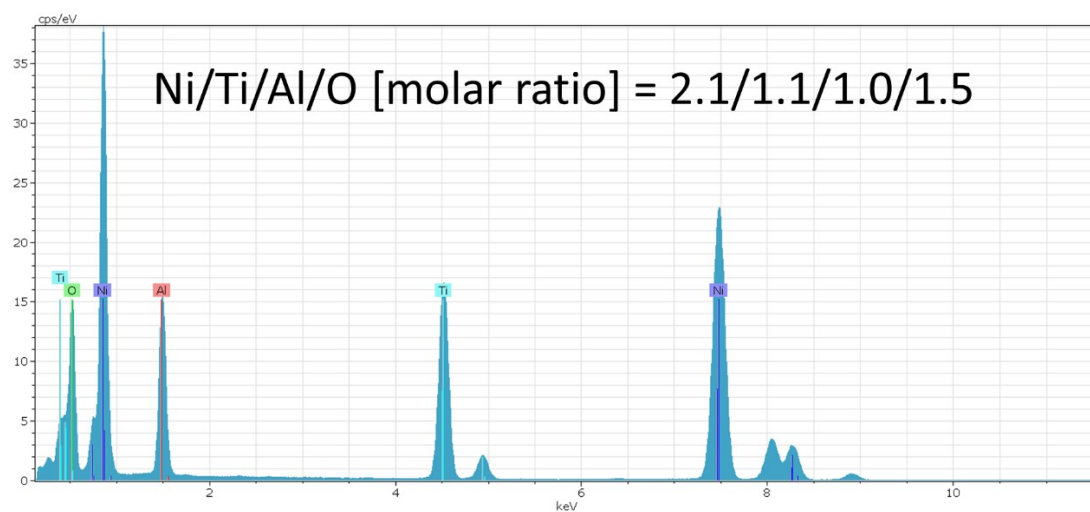

**Fig. S6** Elemental analysis corresponding to the enclosed portion of a HAADF-STEM image in **Fig. 3** with molar ratios for  $\text{Ni}_2\text{TiAl(RDT)}$ .

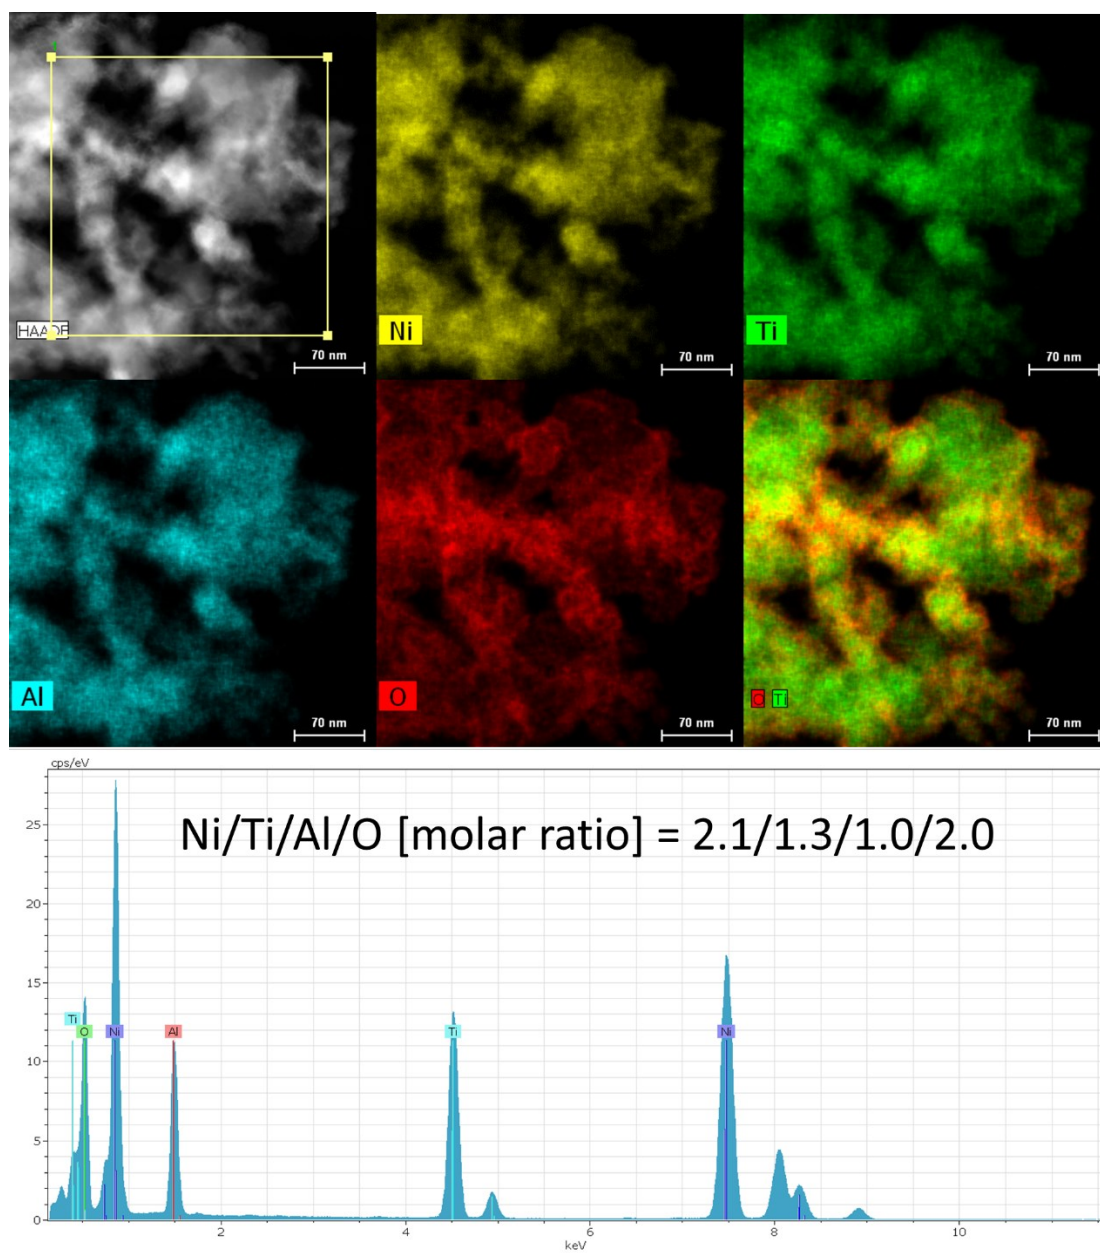

**Fig. S7** HAADF-STEM images and elemental analysis of enclosed portion with molar ratios for  $\text{Ni}_2\text{TiAl(RDT)}$ .

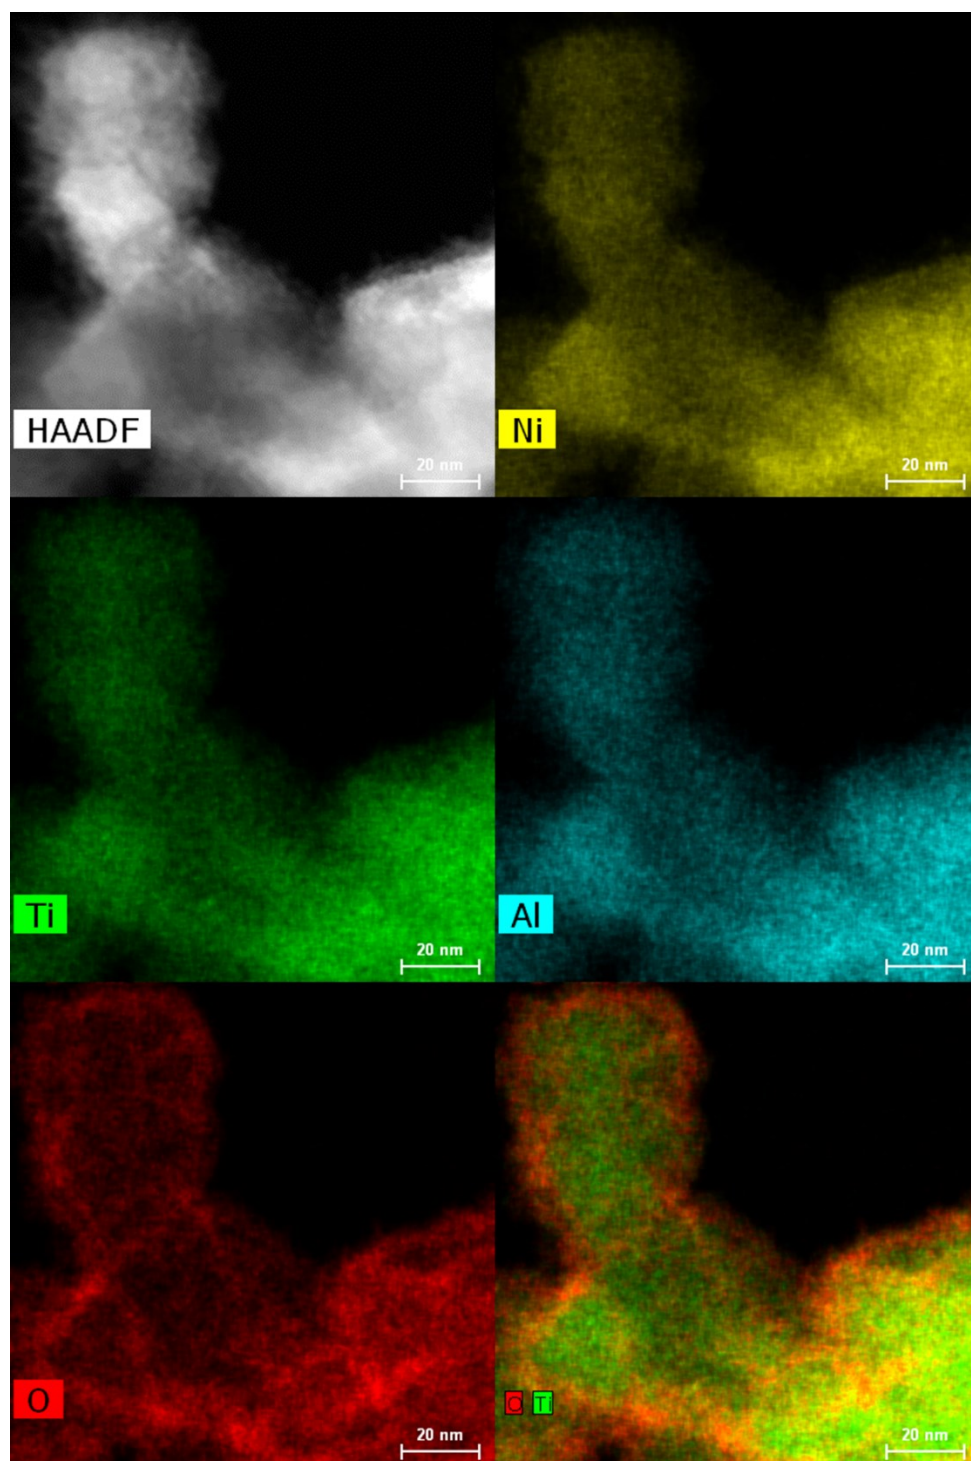

**Fig. S8** HAADF-STEM images and elemental analysis for  $\text{Ni}_2\text{TiAl(RDT)}$ .

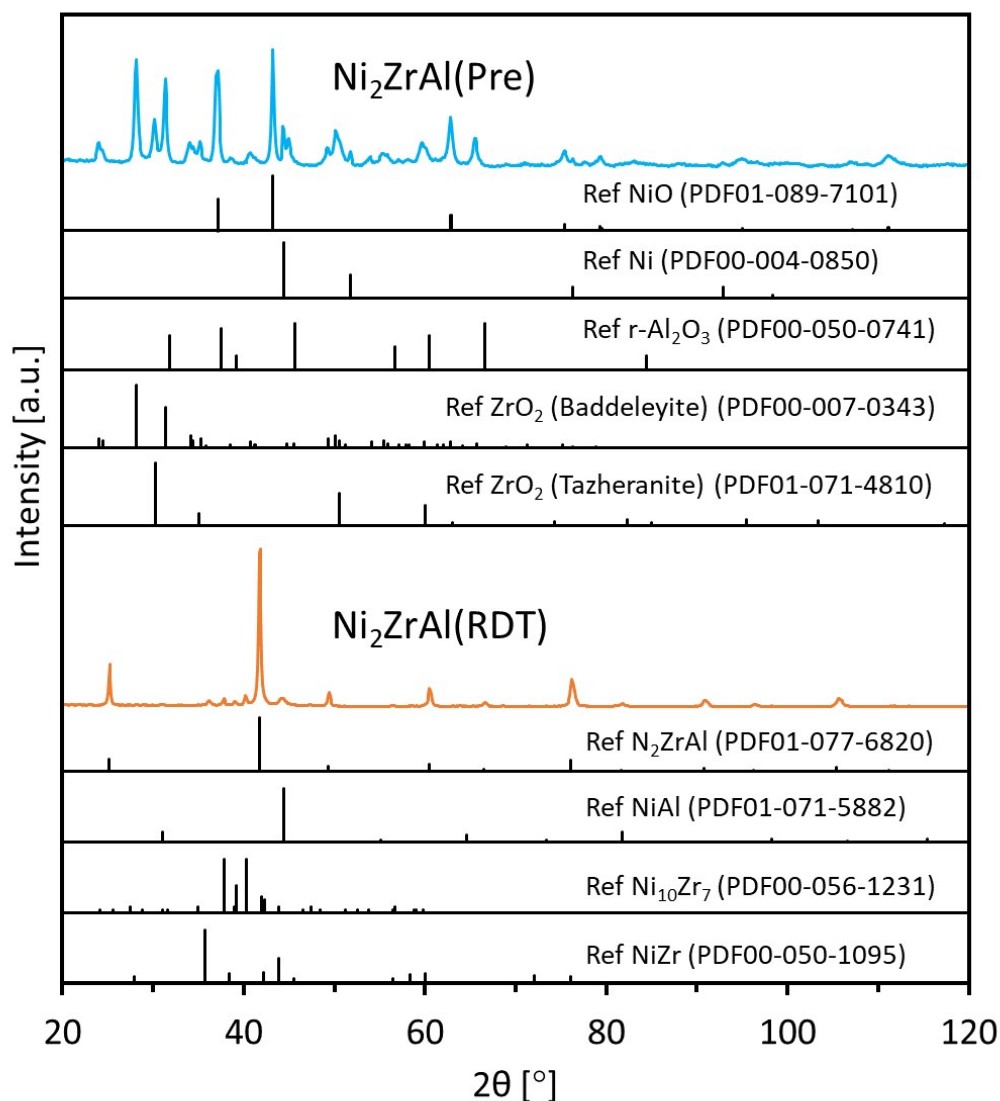

**Fig. S9** XRD patterns of (a) an oxide precursor of  $\text{Ni}_2\text{ZrAl(Pre)}$  and (b) the reduced sample of  $\text{Ni}_2\text{ZrAl(RDT)}$  with possible references. For  $\text{Ni}_2\text{ZrAl(Pre)}$ , the peaks were corresponding to metal oxides ( $\text{NiO}$ ,  $\gamma\text{-Al}_2\text{O}_3$ , and  $\text{ZrO}_2$ ) as well as metallic Ni. For  $\text{Ni}_2\text{ZrAl(RDT)}$ , the peaks were mostly assigned to the targeted intermetallic phases. However, other than an intermetallic  $\text{Ni}_2\text{ZrAl}$  phase, small impurity phases were identified into NiAl,  $\text{Ni}_{10}\text{Zr}_7$  and NiZr for  $\text{Ni}_2\text{ZrAl(RDT)}$ , but they were negligible in comparison with  $\text{Ni}_2\text{ZrAl}$ . The crystallite size of  $\text{Ni}_2\text{ZrAl}$  was estimated as 34 nm from the Scherrer equation.

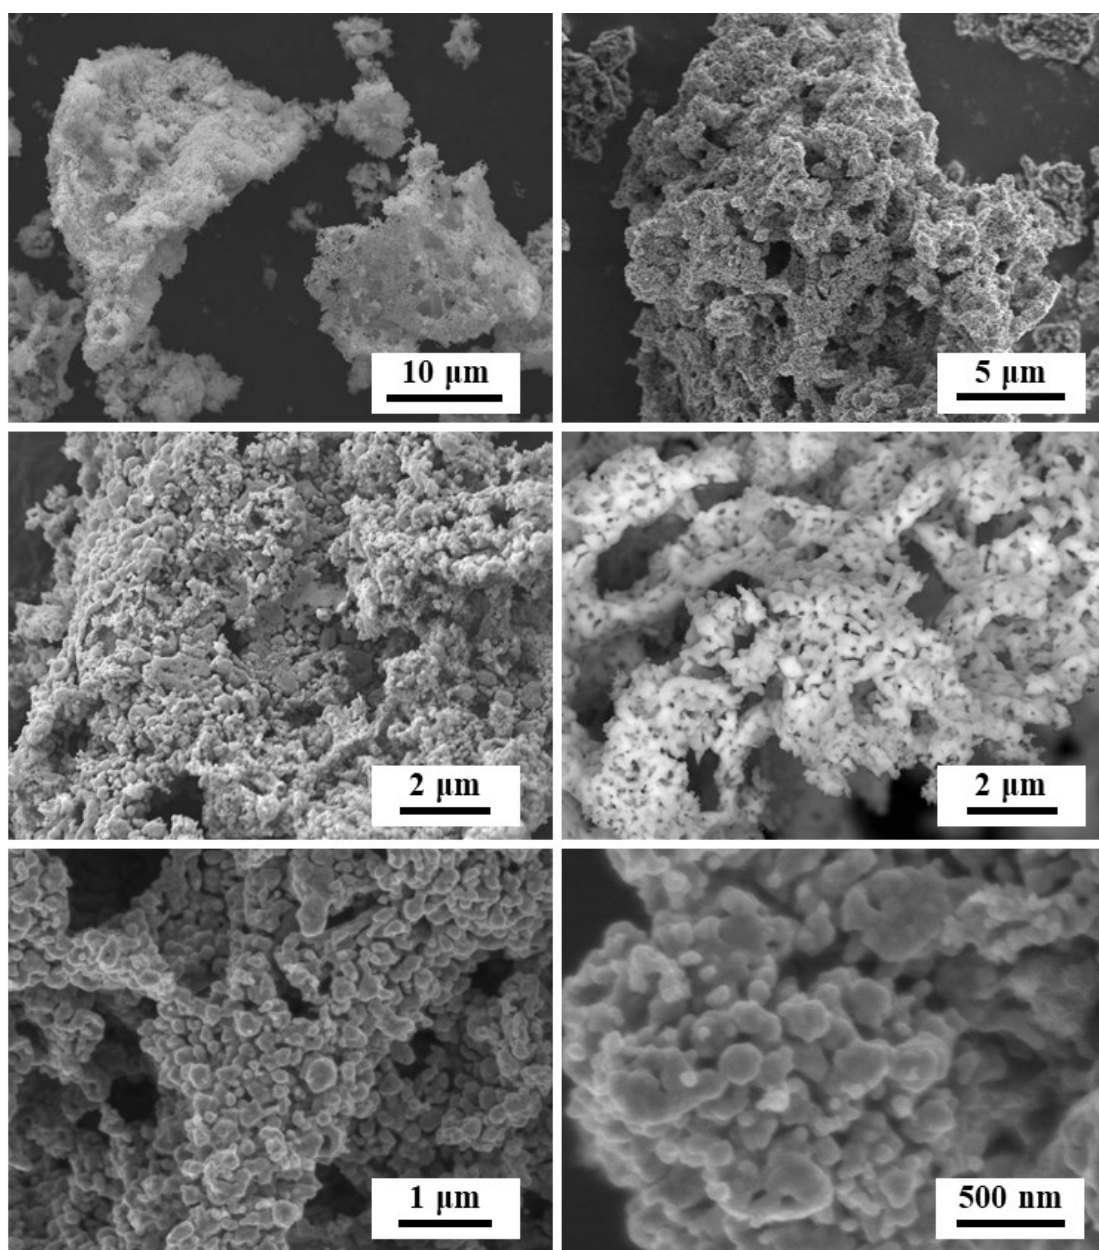

**Fig. S10** SEM images of  $\text{Ni}_2\text{ZrAl(RDT)}$ . Roughly estimating, the average particle size of  $\text{Ni}_2\text{ZrAl(RDT)}$  is larger than  $\text{Ni}_2\text{TiAl(RDT)}$ . The XRD measurements also support the magnitude relationship.

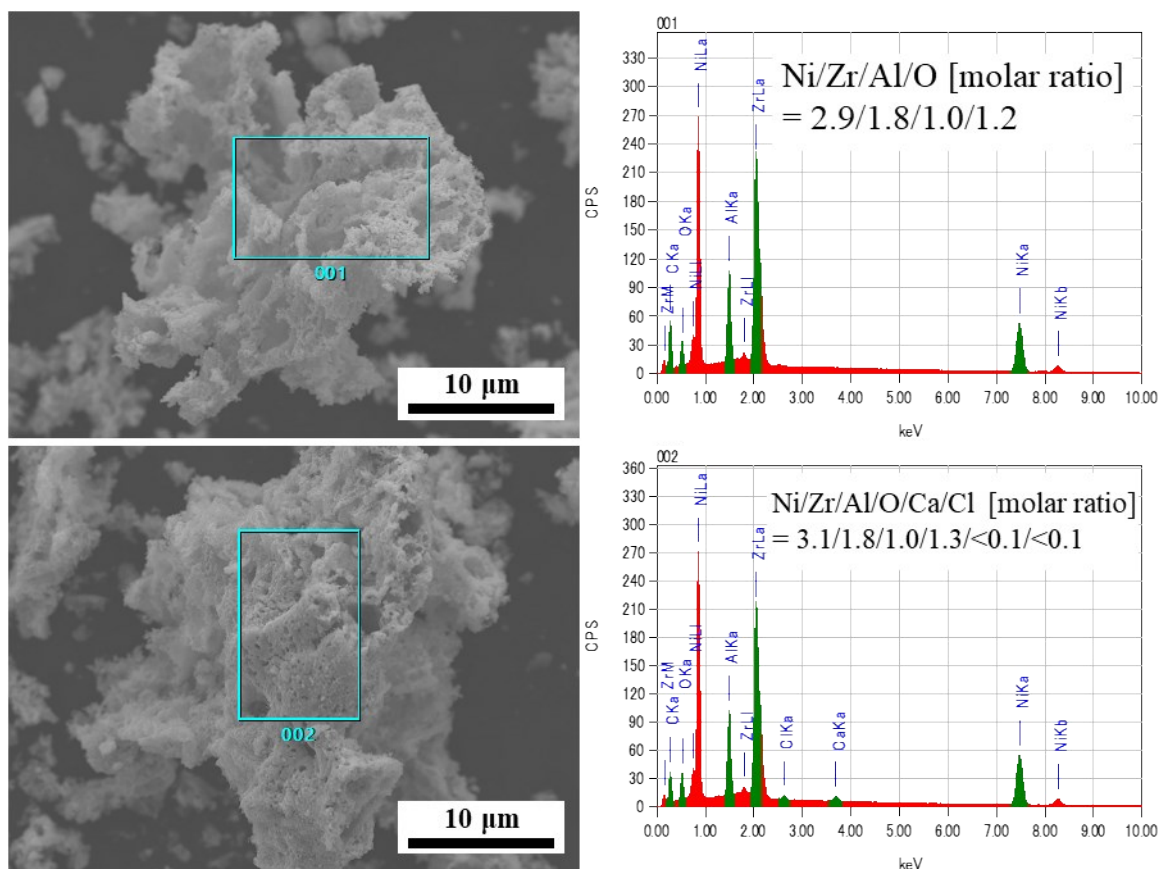

**Fig. S11** SEM images and the elemental analysis of 2 different positions (001 and 002) on  $\text{Ni}_2\text{ZrAl(RDT)}$ . The impurities, such as Ca and Cl, were little detected in the sample, indicating that the post-rinsing treatments by  $\text{NH}_4\text{Cl}$  solution effectively removed these element-related species.

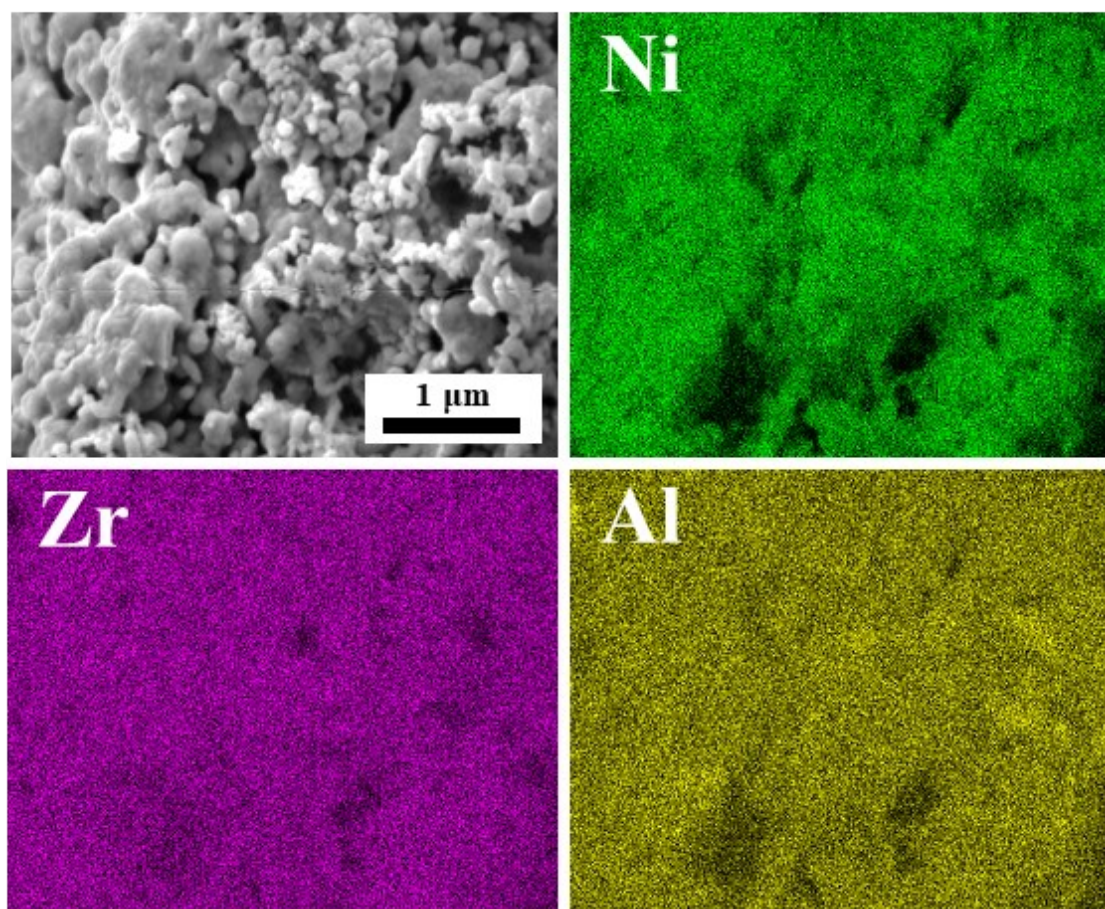

**Fig. S12** A SEM image and the elemental mapping of Ni, Zr and Al on  $\text{Ni}_2\text{ZrAl(RDT)}$ .

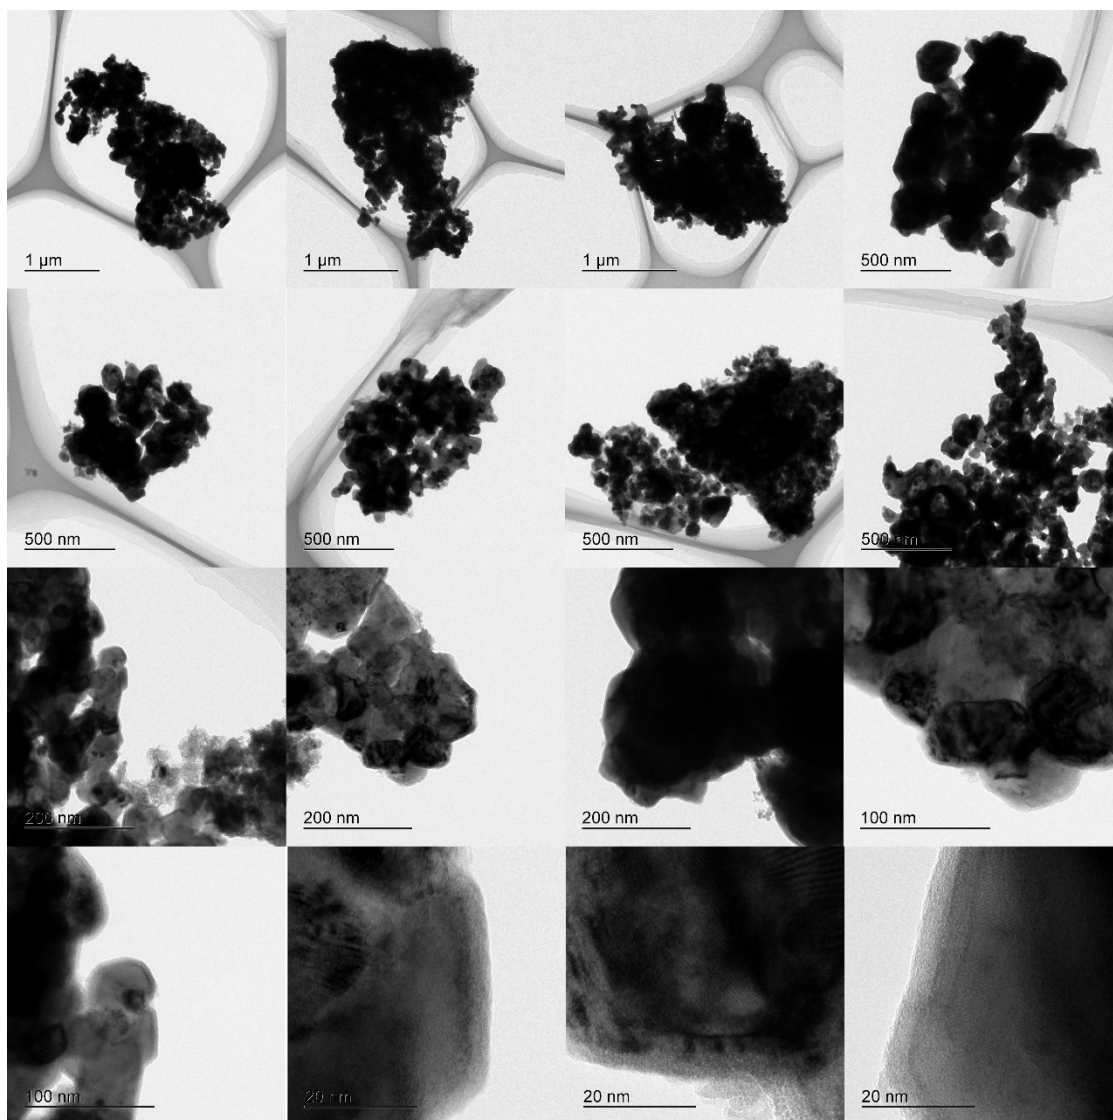

**Fig. S13** TEM images of  $\text{Ni}_2\text{ZrAl(RDT)}$ .

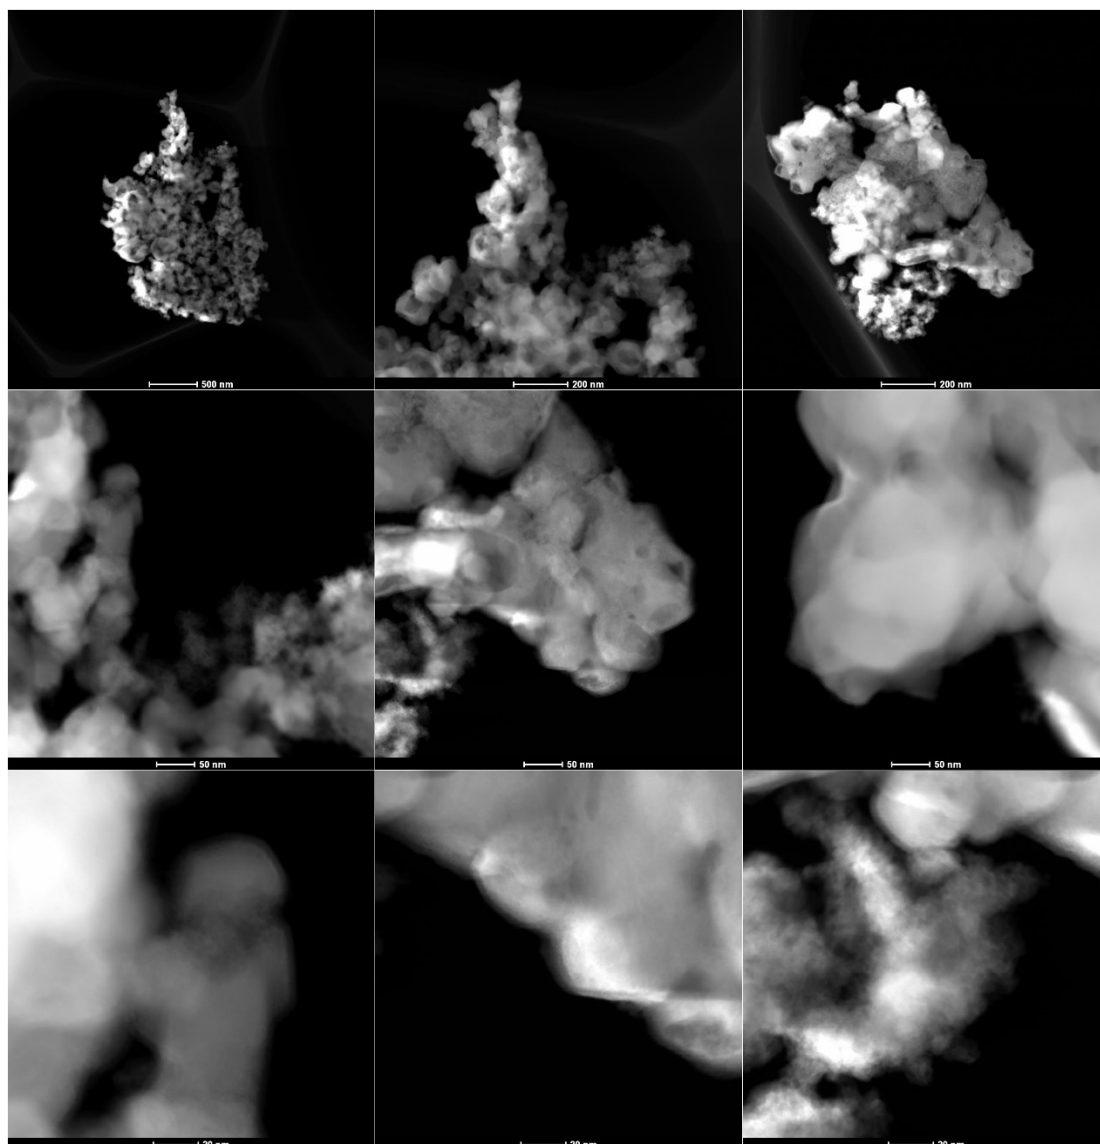

**Fig. S14** HAADF-STEM images of  $\text{Ni}_2\text{ZrAl(RDT)}$ .

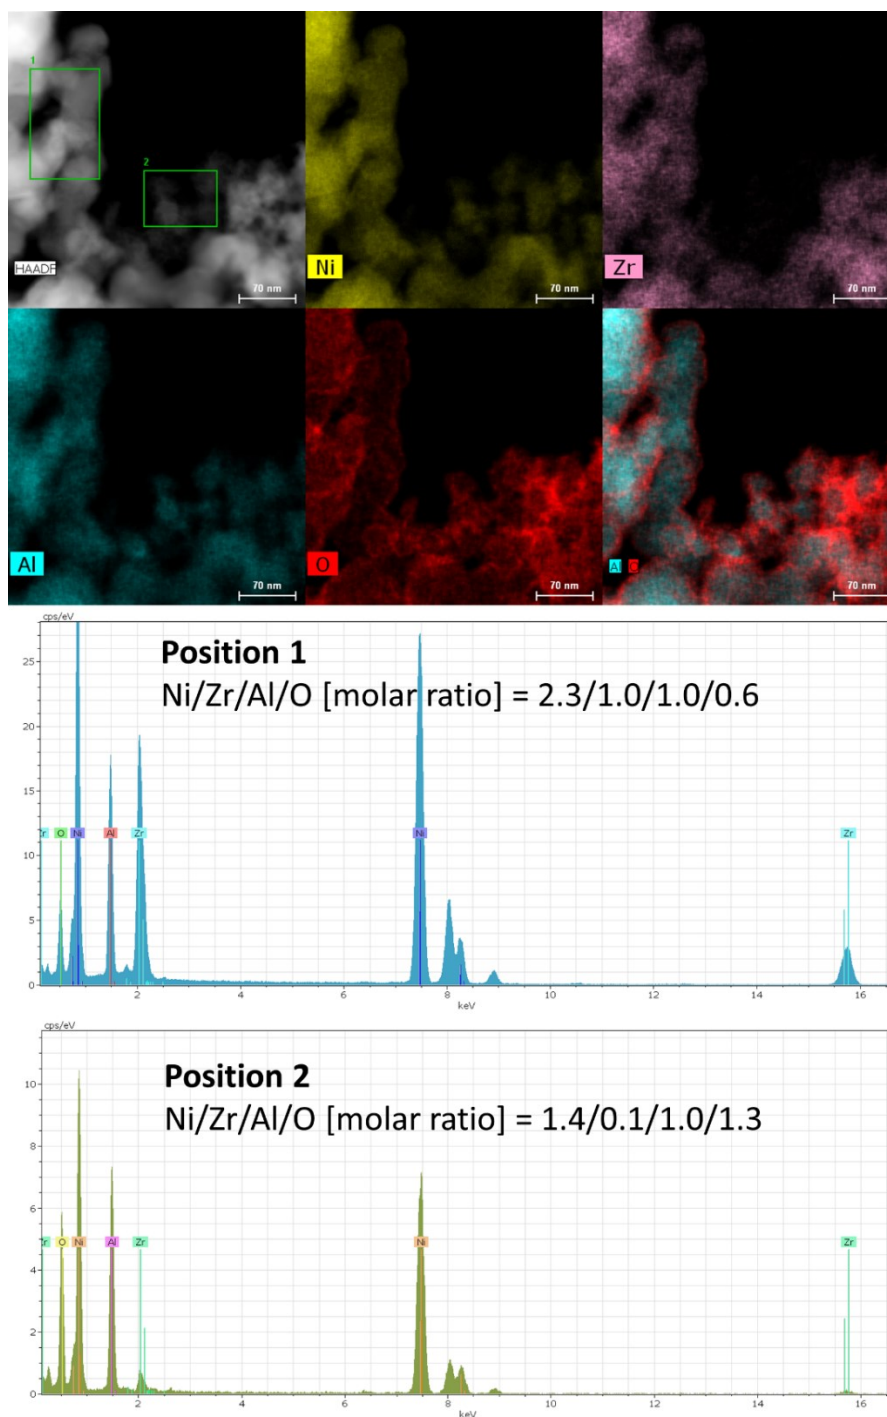

**Fig. S15** HAADF-STEM images and elemental analysis of 2 different enclosed portions with molar ratios for  $\text{Ni}_2\text{ZrAl(RDT)}$ .

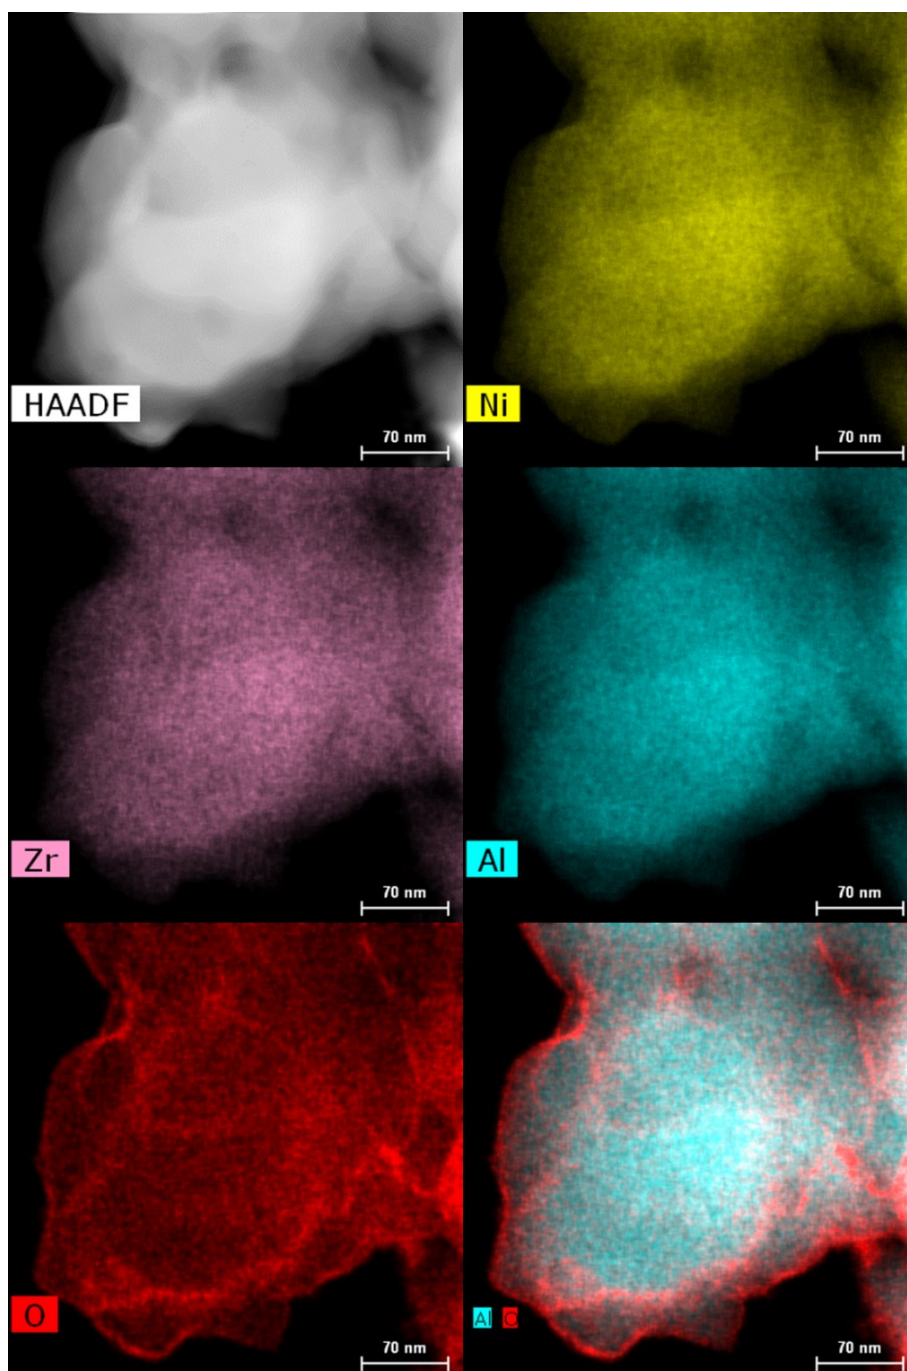

**Fig. S16** HAADF-STEM images and elemental analysis for  $\text{Ni}_2\text{ZrAl(RDT)}$ . We speculated that the activated surface is less stable from a thermodynamical point of view and more sensitive to oxygen than the bulk. Hence, the surface of the obtained sample could be partially oxidized to form stable oxide layers, such as  $\text{ZrO}_2$ , and  $\text{Al}_2\text{O}_3$ , with the thickness of a few nanometers that cannot be detected by XRD apparatuses.

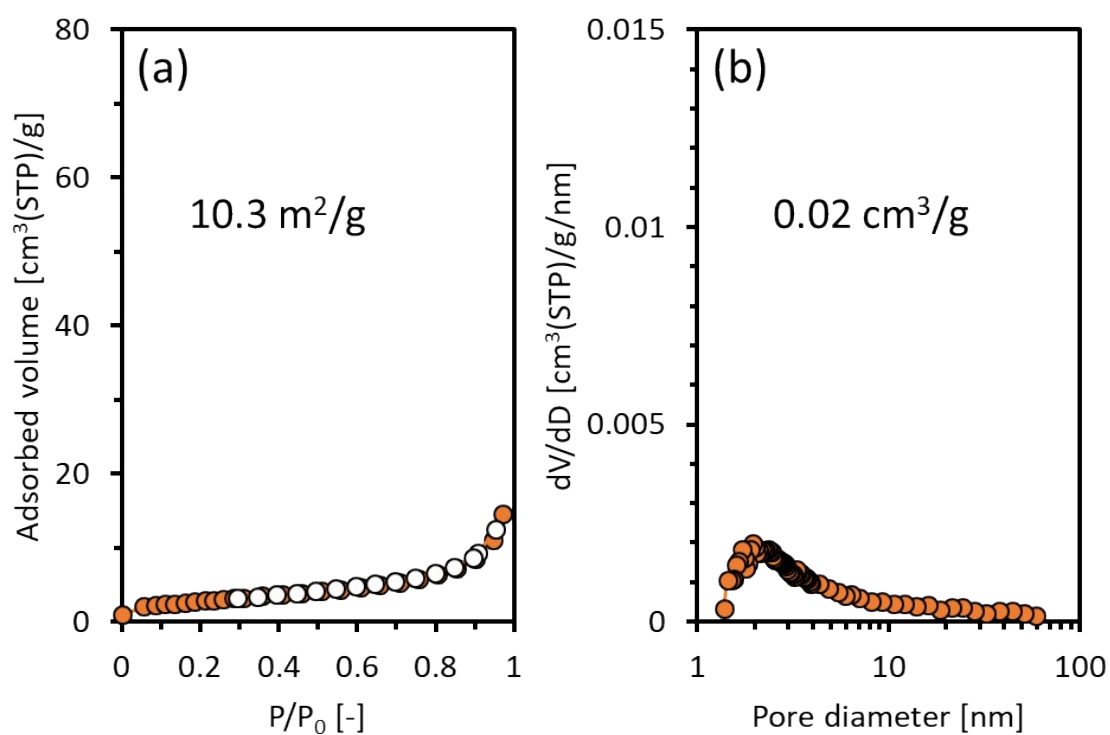

**Fig. S17** (a) Adsorption and desorption isotherms of nitrogen and (b) the pore size distribution for  $\text{Ni}_2\text{ZrAl(RDT)}$ .

**Table S1** BET surface area (SA), pore volume (Vp), and particle size calculated by nitrogen adsorption and XRD measurement.

| Sample                    | SA [m <sup>2</sup> /g] | Vp [cm <sup>3</sup> /g] | Particle size [nm]* |
|---------------------------|------------------------|-------------------------|---------------------|
| Ni <sub>2</sub> TiAl(RDT) | 70.8                   | 0.11                    | 24.0                |
| Ni <sub>2</sub> ZrAl(RDT) | 10.3                   | 0.02                    | 34.4                |

\* Calculated by the Sherrer equation with peaks observed at 43.4° and 41.7° for Ni<sub>2</sub>TiAl and Ni<sub>2</sub>ZrAl, respectively.

**Table S2** Comparison of synthesis method and BET surface area (SA) between reported nickel-based aluminides.

| Sample                     | Synthesis method                                                                                             | SA [m <sup>2</sup> /g] | ref.       |
|----------------------------|--------------------------------------------------------------------------------------------------------------|------------------------|------------|
| Ni <sub>2</sub> TiAl(RDT ) | Chemical route; CaH <sub>2</sub> reduction at 600 °C in a molten LiCl and rinsing at room temperature        | 70.8                   | This study |
| Ni <sub>2</sub> ZrAl(RDT ) |                                                                                                              | 10.3                   | This study |
| NiAl                       |                                                                                                              | 93.7-113.9             | 1, 2       |
| Ni <sub>3</sub> Al         |                                                                                                              | 13.1-27.3              | 2, 3       |
| Ni <sub>2</sub> TiAl       | Physical route; Arc-melting and milling at room temperature                                                  | 0.13                   | 4-6        |
| NiAl                       | Physical route; Hydrogen plasma-metal reaction under H <sub>2</sub> -Ar flow                                 | 26.7                   | 7          |
| Ni <sub>3</sub> Al         |                                                                                                              | 26.2                   |            |
| NiAl                       | Chemical route; LiAlH <sub>4</sub> reduction at 164 °C in 1,3,5-trimethylbenzene and annealing at 650-700 °C | 15                     | 8          |
|                            |                                                                                                              | 26.9                   | 9          |

**Table S3** Number of active sites and BET surface area (SA) for relevant catalysts.

| Catalyst                  | BET SA<br>[m <sup>2</sup> /g] | Number of sites per<br>surface area [sites/m <sup>2</sup> ] | Number of sites per<br>catalyst weight [sites/g] |
|---------------------------|-------------------------------|-------------------------------------------------------------|--------------------------------------------------|
| NiAl                      | 73.5                          | 8.82 x 10 <sup>18</sup>                                     | 6.48 x 10 <sup>20</sup>                          |
| Ni <sub>2</sub> TiAl(RDT) | 70.8                          | 7.13 x 10 <sup>18</sup>                                     | 5.05 x 10 <sup>20</sup>                          |
| Ni <sub>2</sub> ZrAl(RDT) | 10.3                          | 6.32 x 10 <sup>18</sup>                                     | 6.51 x 10 <sup>19</sup>                          |

The numbers of active sites were estimated from the BET surface area and atomic radii (Ni: 1.49 Å, Al: 1.18 Å, Ti: 1.76 Å, Zr: 2.06 Å).

**Table S4** Comparison of TOF and Ea that were calculated by using CH<sub>4</sub> production rates and CO<sub>2</sub> reaction rates.

| Catalyst                            | Reaction conditions for TOF calculation                                                        | TOF [ $\times 100 \text{ s}^{-1}$ ] |                 | Ea [kJ/mol] | ref.       |
|-------------------------------------|------------------------------------------------------------------------------------------------|-------------------------------------|-----------------|-------------|------------|
|                                     |                                                                                                | CH <sub>4</sub>                     | CO <sub>2</sub> |             |            |
| NiAl                                | CO <sub>2</sub> /H <sub>2</sub> /N <sub>2</sub> =1/4/5,<br>GHSV=4200h <sup>-1</sup> ,<br>400°C | 4.7                                 | 5.3             | 65          | This study |
| Ni <sub>2</sub> TiAl(RDT)           |                                                                                                | 0.5                                 | 1.0             | 61          |            |
| Ni <sub>2</sub> ZrAl(RDT)           |                                                                                                | 4.6                                 | 11.2            | 104         |            |
| 13Ni/Al <sub>2</sub> O <sub>3</sub> | CO <sub>2</sub> /H <sub>2</sub> =1/4,<br>GHSV=36000h <sup>-1</sup> ,<br>410°C                  | -                                   | 82.0            | -           | 10         |
| 5Ni/Al <sub>2</sub> O <sub>3</sub>  | CO <sub>2</sub> /H <sub>2</sub> /N <sub>2</sub> =60/15/20,<br>F/W=2.5mL/g/s,<br>400°C          | 150                                 | -               | -           | 11         |
| 15Ni/Al <sub>2</sub> O <sub>3</sub> |                                                                                                | 191                                 | -               | -           |            |
| 25Ni/Al <sub>2</sub> O <sub>3</sub> |                                                                                                | 202                                 | -               | -           |            |
| 40Ni/Al <sub>2</sub> O <sub>3</sub> |                                                                                                | 132                                 | -               | -           |            |
| 5Ni/TiO <sub>2</sub>                | CO <sub>2</sub> /H <sub>2</sub> /Ar=3/12/5,<br>GHSV=1800-9000h <sup>-1</sup> ,<br>200°C        | 0.21                                | -               | -           | 12         |
| 10%Ni/TiO <sub>2</sub>              |                                                                                                | 0.13                                | -               | -           |            |
| 15%Ni/TiO <sub>2</sub>              |                                                                                                | 0.12                                | -               | -           |            |
| 20%Ni/TiO <sub>2</sub>              |                                                                                                | 0.09                                | -               | -           |            |
| 4Ni/ZrO <sub>2</sub>                | CO <sub>2</sub> /H <sub>2</sub> =1/4,<br>F/W=1.5mL/g/s,<br>200°C                               | 43                                  | -               | -           | 13         |
| Sponge Ni                           | CO <sub>2</sub> /H <sub>2</sub> /N <sub>2</sub> =1/4/5,<br>GHSV=4200h <sup>-1</sup> ,<br>250°C | -                                   | -               | 70          | 14         |
| Ni/CeO <sub>2</sub>                 |                                                                                                | -                                   | -               | 99          |            |

In comparison with TOFs, our catalysts give very low values than the common supported catalysts, such as Ni/Al<sub>2</sub>O<sub>3</sub>, Ni/TiO<sub>2</sub> and Ni/ZrO<sub>2</sub>. As suggested by TEM-EDS analysis (**Fig. 3**, **Fig. S16**), the surface of used Ni<sub>2</sub>TiAl and Ni<sub>2</sub>ZrAl catalysts were covered by some oxides, such as Al<sub>2</sub>O<sub>3</sub>, TiO<sub>2</sub> and ZrO<sub>2</sub>. It is impossible to reduce these oxides by a hydrogen pretreatment made at 500 °C. Therefore, the actual number of surface nickel site estimated from the BET surface areas on NiAl, Ni<sub>2</sub>TiAl(RDT), and Ni<sub>2</sub>ZrAl(RDT) could be much lower than the estimated values, possibly leading to the underestimation of TOF values in this study.

## References

1. Y. Kobayashi, S. Tada and R. Kikuchi, *J. Chem. Eng. Jpn.*, DOI:10.1252/jcej.20we085, in press.
2. Y. Kobayashi, S. Tada and R. Kikuchi, *Chem. Lett.*, 2020, **49(4)**, 341.
3. Y. Kobayashi, *Chem. Lett.*, 2019, **48(12)**, 1496.
4. T. Kojima, S. Kameoka and A.-P. Tsai, *ACS Omega*, 2017, **2**, 147.
5. T. Kojima, S. Kameoka, S. Fujii, S. Ueda and A.-P. Tsai, *Sci. Adv.*, 2018, **4**, eaat6063.
6. T. Kojima, S. Kameoka and A.-P. Tsai, *ACS Omega*, 2019, **4**, 21666.
7. Z. Wang, A. L. Fan, W. H. Tian, Y. T. Wang and X. G. Li, *Mater. Lett.*, 2006, **60**, 2227.
8. X. Chen, Y. Ma, L. Wang, Z. Yang, S. Jin, L. Zhang and C. Liang, *ChemCatChem*, 2015, **7**, 978.
9. S. H. Kim, J. Choi, J. Yun and E.-W. Jeong, *RSC Adv.*, 2017, **7**, 16709.
10. David Méndez-Mateos, V. Laura Barrio, Jesús M. Requies and José F. Cambra, *RSC Adv.*, 2020, **10**, 16551.
11. Zhanming Zhang, Yue Tian, Lijun Zhang, Song Hu, Jun Xiang, Yi Wang, Leilei Xu, Qing Liu, Shu Zhang and Xun Hu, *Int. J. hydrog. Energy*, 2019, **44**, 9291.
12. Jie Liu, Changming Li, Fei Wang, Shan He, Hao Chen, Yufei Zhao, Min Wei, David G. Evans and Xue Duan, *Catal. Sci. Technol.*, 2013, **3**, 2627.
13. Michiaki Yamasaki, Hiroki Habazaki, Katsuhiko Asami, Kohichi Izumiya, Koji Hashimoto, *Catal. Comm.*, 2006, **7**, 24.
14. Shohei Tada, Shun Ikeda, Naohiro Shimoda, Tetsuo Honma, Makoto Takahashi, Akane Nariyuki, Shigeo Satokawa, *Int. J. hydrog. Energy*, 2017, **42**, 30126.
